# Supplementary material
Source: HighWire-hosted journal article supplement (http://www.qdcxjkg.com/highwire/filestream/113592/field_highwire_adjunct_files/0/CME365cropped.pdf)
Supplement: CME365cropped.pdf [file CME365cropped.pdf]

# CME Credit Application Form

## (1 CME credit)

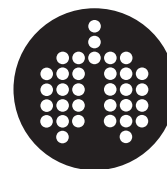

To receive CME credits, read the CME article in this issue, indicate the correct responses to the educational questions and complete the requested information. This form is also available in electronic format at [www.erj.ersjournals.com/current.dtl](http://www.erj.ersjournals.com/current.dtl). To return your application, you can either:

- ▶ use this form and return it completed to ERS Publications Office, 442 Glossop Road, Sheffield, S10 2PX, UK; fax to +44-114-2665064; or e-mail to [info@ersj.org.uk](mailto:info@ersj.org.uk)
- ▶ fill in the online form at [www.erj.ersjournals.com/current.dtl](http://www.erj.ersjournals.com/current.dtl)

Certificates will be e-mailed to the address filled in below. Please allow 4 weeks for processing.

**CME credit applications are now free of charge.**

### Applicant personal details.

ERS Membership No. (if known): ..... Date of Birth (DD/MM/YYYY): .....

Family Name: ..... First Name: .....

Mailing Address: .....

Postal Code: ..... City: ..... Country: .....

Telephone: + ..... E-mail: .....

### Educational questions.

#### "Inhaled drugs as risk factors for community-acquired pneumonia"

For each statement, mark appropriately in every box with a (+) for true or (-) for false.

1. Which of the following items has not been used in matching patients and controls in this study?

- Age  $\pm$ 5 yrs.  Sex.  Municipality.  Selection control every 3 months by a simple random method.

2. Which of the following statements is true?

- Inhaled corticoids are a risk factor for CAP in CB patients.  Inhaled corticoids are a risk factor for CAP in COPD patients.  
 Inhaled corticoids are a risk factor for CAP in asthma patients.  All of the above.

3. Which of the following statements is true?

- Inhaled anticholinergics are a risk factor for CAP in CB patients.  Inhaled anticholinergics are a risk factor for CAP in COPD patients.  Inhaled anticholinergics are a risk factor for CAP in asthma patients.

4. Which of the following statements is true?

- Inhaled  $\beta_2$ -adrenergic agonists are a risk factor for CAP in CB patients.  Inhaled  $\beta_2$ -adrenergic agonists are a risk factor for CAP in COPD patients.  Inhaled  $\beta_2$ -adrenergic agonists are a risk factor for CAP in asthma patients.  None of the above.

5. Inhaled steroids could be a risk factor of CAP; which of the following possible explanations is not involved?

- Mucosa dryness due to inhaled corticosteroids.  The risk of CAP would appear only in patients with more severe bronchopathy.  
 The risk of CAP would be related with higher doses.  The risk of CAP, associated with inhaled corticosteroids, cannot be explained by known confounding factors.

6. In relation to biological explanations for association between anticholinergic effects and CAP. Which of the following statements is true?

- Inhibition of ciliary activity.  Reduction in clearance mechanisms of the mouth.  Reduction in mucous secretion.  All of the above.
